# Supplementary material
Source: PubMed Central journal article supplement (PMC6261922)
Supplement: ijmeg0009-0043-f6.pdf [file ijmeg0009-0043-f6.pdf]

# Centromere-associated protein E is alternatively spliced in leukemia

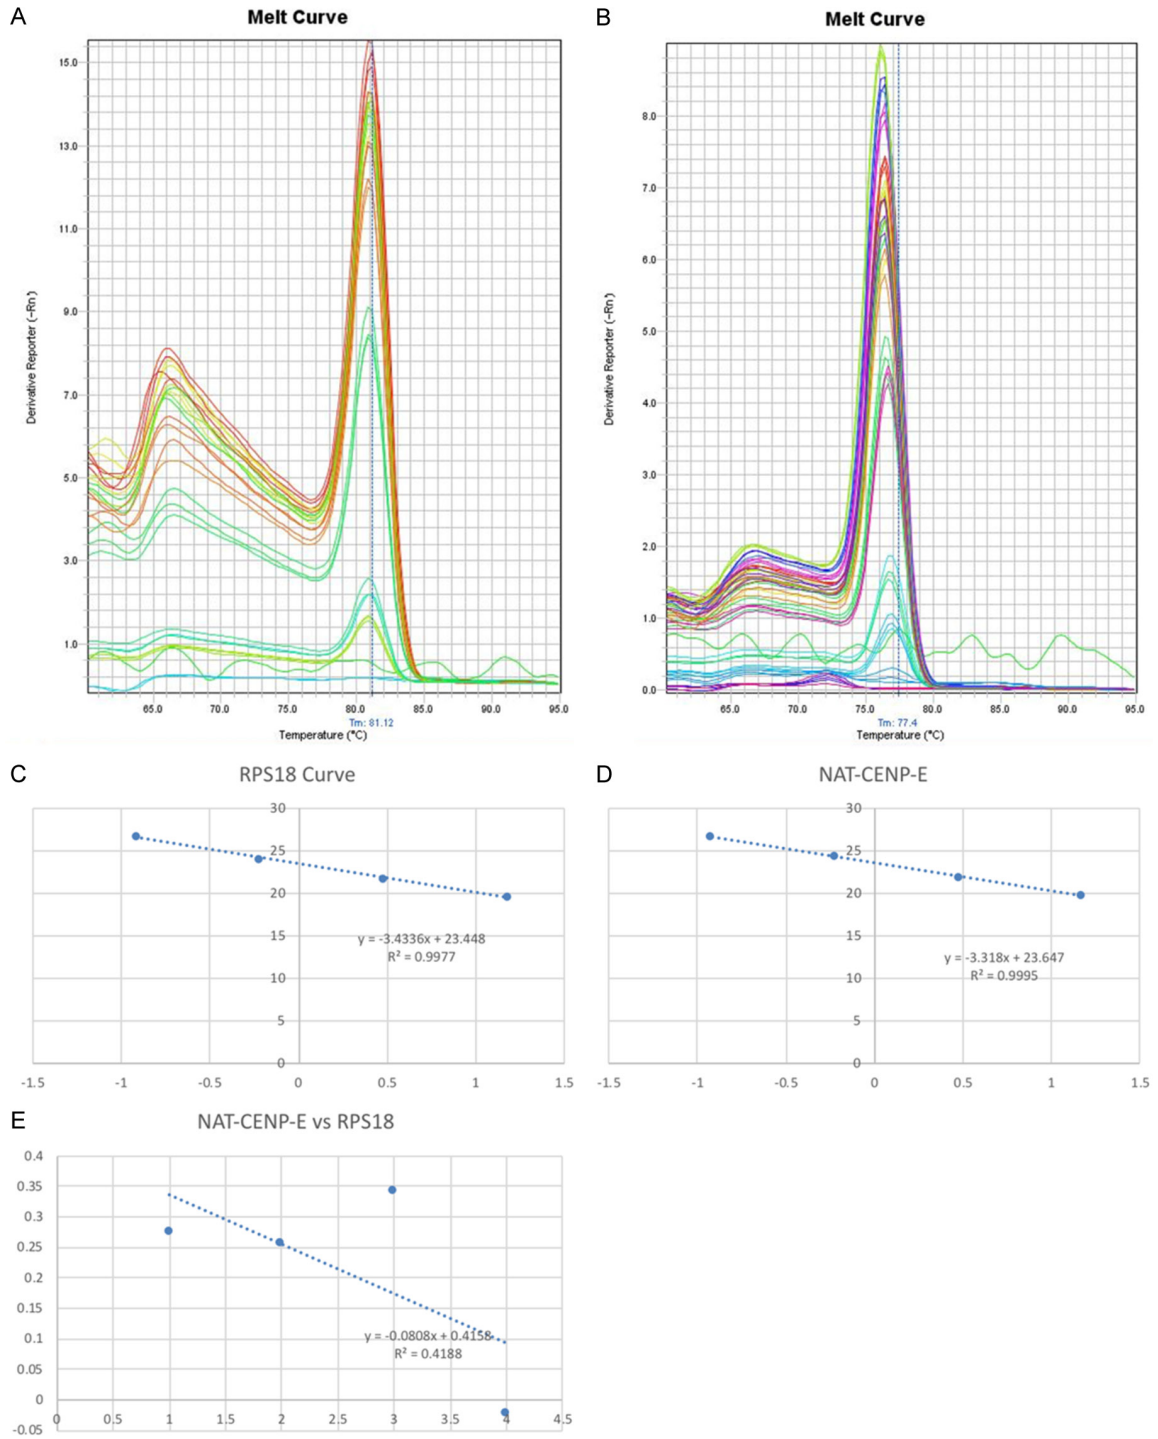

**Supplementary Figure 1.** Quantitative RT-PCR standardization. Curve melting showed only one amplification product of PCR. (A) RPS18 transcript. (B) NAT-CENP-E. Curve amplification using 1:5 dilution in (C) RPS18 and (D) NAT-CENP-E. (E) Validation of expression of NAT-CENP-E vs RPS18.
